# Supplementary material for: A Combinatorial Approach to Optimize the Production of Curcuminoids From Tyrosine in Escherichia coli
Source: PubMed Central journal article supplement (PMC7019186; doi:10.3389/fbioe.2020.00059), 2020-02-07
Supplement: Data_Sheet_1.pdf [file Data_Sheet_1.pdf]

## *Supplementary Material*

**Table S1.** Gene sequence of COMT with codon optimization.

| Gene                                  | Sequence                                                                                                                                                                                                                                                                                                                                                                                                                                                                                                                                                                                                                                                                                                                                                                                                                                                                                                                                                                                                                                                                                                                                                                                                |
|---------------------------------------|---------------------------------------------------------------------------------------------------------------------------------------------------------------------------------------------------------------------------------------------------------------------------------------------------------------------------------------------------------------------------------------------------------------------------------------------------------------------------------------------------------------------------------------------------------------------------------------------------------------------------------------------------------------------------------------------------------------------------------------------------------------------------------------------------------------------------------------------------------------------------------------------------------------------------------------------------------------------------------------------------------------------------------------------------------------------------------------------------------------------------------------------------------------------------------------------------------|
| COMT<br><i>(Arabidopsis thaliana)</i> | ATGGGCTCGACCGCCGAAACGCAGCTGACGCCAGTGCAGGTTACCGATGACGAAGCGGC<br>ACTGTTTGCCATGCAGCTGGCGTCCGCCTCGGTCTTGCCAATGGCGCTCAAAGCGCGTT<br>GGAGCTGGATCTGCTCGAAATTATGGCGAAAAATGGCTCGCCGATGTCCCGACCGAGA<br>TCGCCAGTAAATTACCAACGAAAAATCCGGAGGCGCCGGTGATGCTCGACCGTATTCTG<br>CGTCTTTTGACCTCGTATAGTGTTTAACCTGCAGTAATCGTAAATTATCGGGCGACGGT<br>GTGGAACGCATCTACGGTCTGGGCCAGTTTGCAAATATCTGACGAAAAATGAGGACGG<br>TGTTAGCATCGCGCCCTGTGTCTGATGAACCAGGATAAAGTTCTGATGGAATCCTGGTA<br>TCACCTCAAAGATGCGATCCTGGATGGCGGCATTCCGTTTAAACAAAGCCTATGGTATGAG<br>CGCCTTCGAATATCATGGTACTGACCCACGTTTTAATAAAGTGTTTAACAATGGCATGAG<br>TAATCATTGACCATTACCATGAAAAAGATTTAGAGACTTACAAGGGCTTTGAAGGCTT<br>AACCTCCCTGGTTGATGTGGGCGGCGGCATCGGCGCGACCCTGAAAATGATTGTGAGCA<br>AATATCCGAATCTGAAAGGTATTAACCTTTGATCTCCGCATGTTATCGAGGACGCACCGA<br>GTCACCCAGGTATCGAGCATGTGGGCGGCGACATGTTTGTGAGTGTTCCGAAGGGCGAC<br>GCGATCTTTATGAAATGGATTTGTCATGATTGGAGTGATGAGCATTGTGTCAAATTTCTT<br>AAAAAATTGTTATGAATCGTTACCAGAGGATGGTAAAGTTATTCTGGCAGAATGCATTTTA<br>CCAGAAACCCCGATTCCAGCTTGTCCACCAAACAGGTCGTGCACGTTGACTGTATCATG<br>TTAGCCCATAAACCCAGGCGGCAAAGAGCGCACCGAAAAAGAATTCGAGGGCGTTGGCGA<br>AAGCAAGCGGCTTCAAAGGTATCAAGGTTGTCTGTGATGCCTTTGGTGTGAATCTGATTG<br>AACTCCTGAAGAACTGTAA |

**Table S2.** Primers for PCR amplification of the genes of the biosynthetic pathway (forward (FW) and reverse (REV) primers) and sequencing.

| Primer name   | Primer sequence <sup>†</sup>                      | Restriction enzyme site |
|---------------|---------------------------------------------------|-------------------------|
| COMT_pAC_FW   | AAAAATCTAGAA <b>TGGG</b> CTCGACCGCCG              | XbaI                    |
| COMT_pAC_REV  | AAAAAGCGGCCG <b>TTAC</b> AGTTTCTTCAGGAGTTCAATCAGA | NotI                    |
| COMT_duet_FW  | AAAAAGGATCCAAT <b>TGGG</b> CTCGACCGCCG            | BamHI                   |
| COMT_duet_REV | AAAAACTCGAG <b>TTAC</b> AGTTTCTTCAGGAGTTCAATCAGA  | XhoI                    |
| COMT_duet_FW2 | AAAAACATAT <b>TGGG</b> CTCGACCGCCG                | NdeI                    |
| 4CL_FW        | AAAAAGGATCCGAT <b>TGGC</b> GCCACAAGAACAAG         | BamHI                   |
| 4CL_REV       | AAAAAAAGCT <b>TTT</b> CACAATCCATTTGCTAGTTTTG      | HindIII                 |
| 4CL_FW2       | AAAAACATATGAT <b>TGGC</b> GCCACAAGAACA            | NdeI                    |
| 4CL_REV2      | AAAAACTCGAG <b>TC</b> ACAATCCATTTGCTAGTTTTGC      | XhoI                    |
| TAL_FW        | TTTTTGATATCCAT <b>TGG</b> CTCCGCGTCCG             | EcoRV                   |
| TAL_REV       | TTTTTCTCGAG <b>TTAT</b> GCCAGCATTTTCA             | XhoI                    |
| C3H_FW        | AAAAACATAT <b>TG</b> ACGATTACCTCTCCGG             | NdeI                    |
| C3H_REV       | TTTTTTCTCGAGCGTGCCCGGGTTAATCAG                    | XhoI                    |
| DCS_FW        | TTTTTCATATGAT <b>TG</b> GAAGCTAACGGTTACCG         | NdeI                    |
| DCS_REV       | AAAAACTCGAG <b>TTAG</b> TTCAGACGGCAAGAGTG         | XhoI                    |
| pAC_seq_FW    | ACTATCGACTACGCGATCAT                              | -                       |
| pAC_seq_REV   | ATCGGTGATGTCGGCGATA                               | -                       |
| pDuet_seq_FW  | GGATCTCGACGCTCTCCCTT                              | -                       |
| pDuet_seq_FW2 | GTACACGGCCGCATAATCG                               | -                       |
| pDuet_seq_REV | CTAGTTATTGCTCAGCGGT                               | -                       |

<sup>†</sup> Start and stop codons in **bold**; restriction sites in *italic*; In order for the sequence to remain in frame one base was occasionally added between the restriction site and the gene start codon.

**Table S3.** Primers (forward (FW) and reverse (REV)) used in the construction and verification of pKDsgRNA-*lacZ*.

| Primer name               | Primer sequence†                                                      |
|---------------------------|-----------------------------------------------------------------------|
| Fragment1_Protospacer_FW  | <u>AGATGTGCGGCGAGTTGCGTGACTACCTAC</u> <b>gttt tagagctagaaatagcaag</b> |
| Fragment1_REV*            | <b>tttataacctccttagagctcga</b>                                        |
| Fragment2_FW*             | <b>ccaattgtccatattgcatca</b>                                          |
| Fragment2_Protospacer_REV | <u>GTAGGTAGTCACGCAACTCGCCGCACATCT</u> <b>gtgc tcagtatcttactga</b>     |
| pKD_Seq5*                 | CAGTGAATGGGGGTAAATGG                                                  |
| sgRNA_R*                  | GCCTGCAGTCTAGACTCGAG                                                  |

\* primers described in Reisch and Prather (2015)  
† The underlined sequences (30 nt) represent the protospacer described in Chung et al. (2017); sequences in **bold** are complementary to plasmid pKDsg-p15A

**Table S4.** Oligonucleotide used for the disruption of *lacZ* gene. The nucleotides that are homologous to the upstream region of *lacZ* and to its the intergenic region are underlined and **bold**, respectively.

| Oligonucleotide    | Sequence                                                                                                             |
|--------------------|----------------------------------------------------------------------------------------------------------------------|
| Oligo_ <i>lacZ</i> | <u>TCGTATGTTGTGTGGAATTGTGAGCGGATAACAATTCACACAGGAAACAC</u> <b>CGCGTG GATGAAGACCAGCCCTTCCCGGCTGTGCCGAAATGGTCCATCAA</b> |

**Table S5.** Primers (forward (FW) and reverse (REV)) used to verify *lacZ* disruption, described in Chung et al. (2017).

| Primer name | Primer sequence       |
|-------------|-----------------------|
| LacZ_FW     | GTTGGCCGATTCATTAATGCA |
| LacZ_REV    | TACTGTGAGCCAGAGTTGCC  |

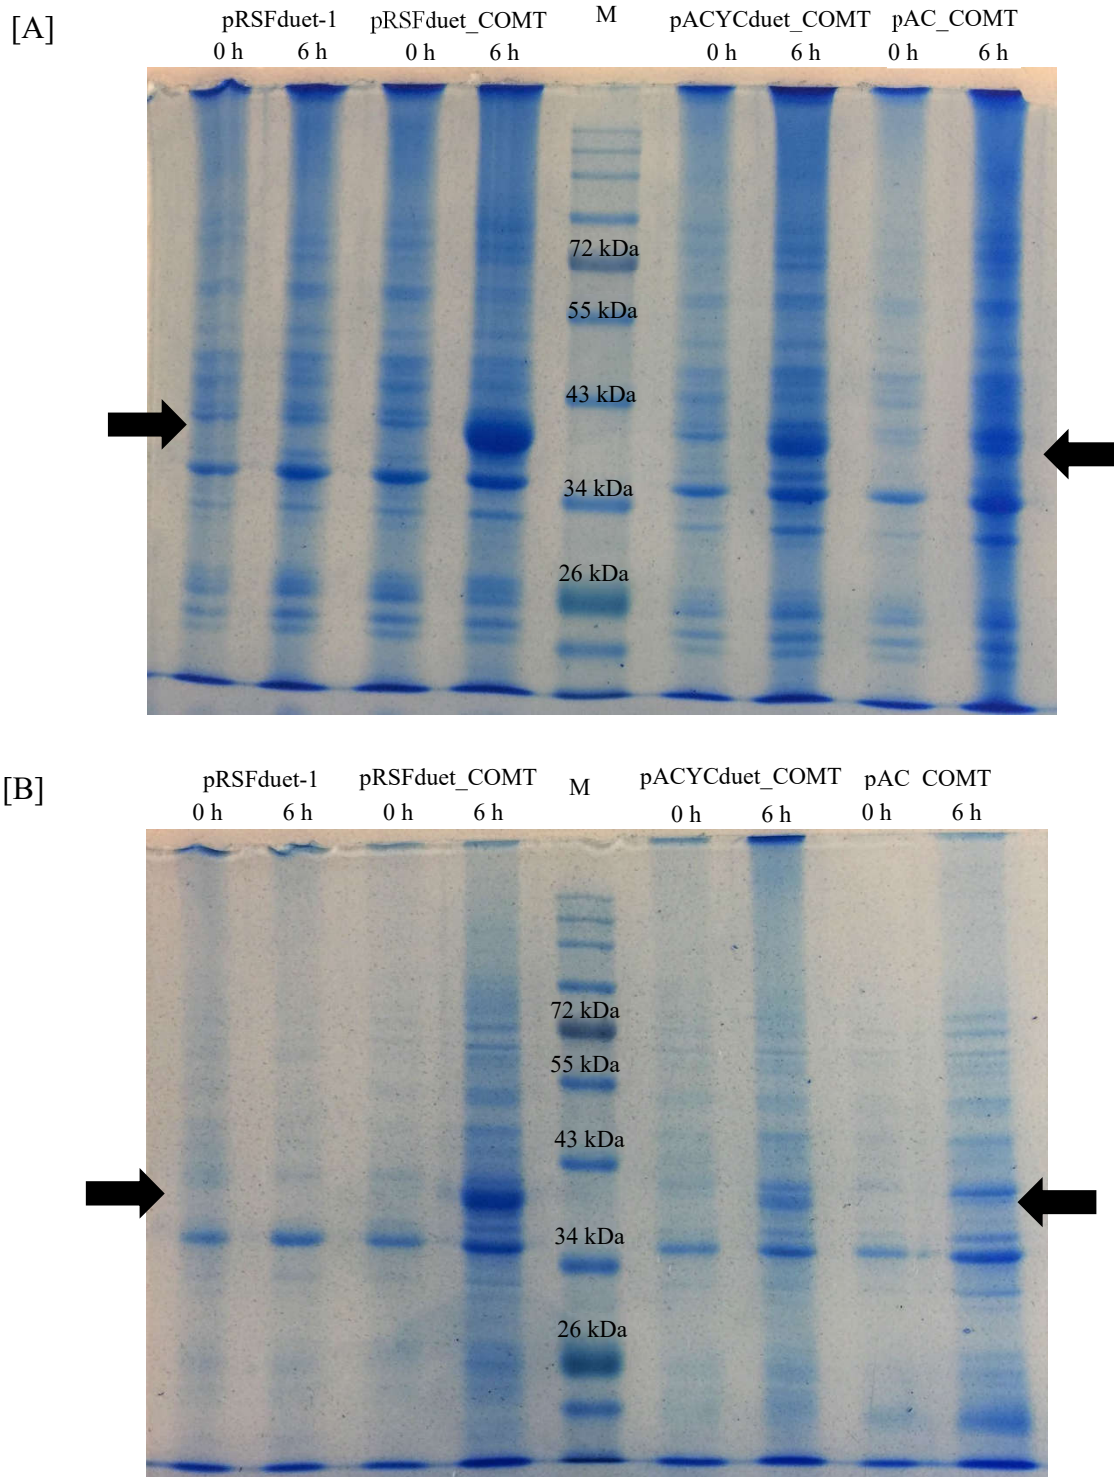

**Figure S1:** Protein SDS gels showing caffeic acid O-methyl transferase (COMT) expression using different plasmids (pRSFduet-1, pACYCduet-1 and pAC) at time zero of induction and after 6 h of induction. COMT is expected around 39.62. Arrows indicate where it is possible to observe the bands of interest. M: marker (Color protein standard broad range – NEB). Soluble (A) and insoluble (B) fractions.

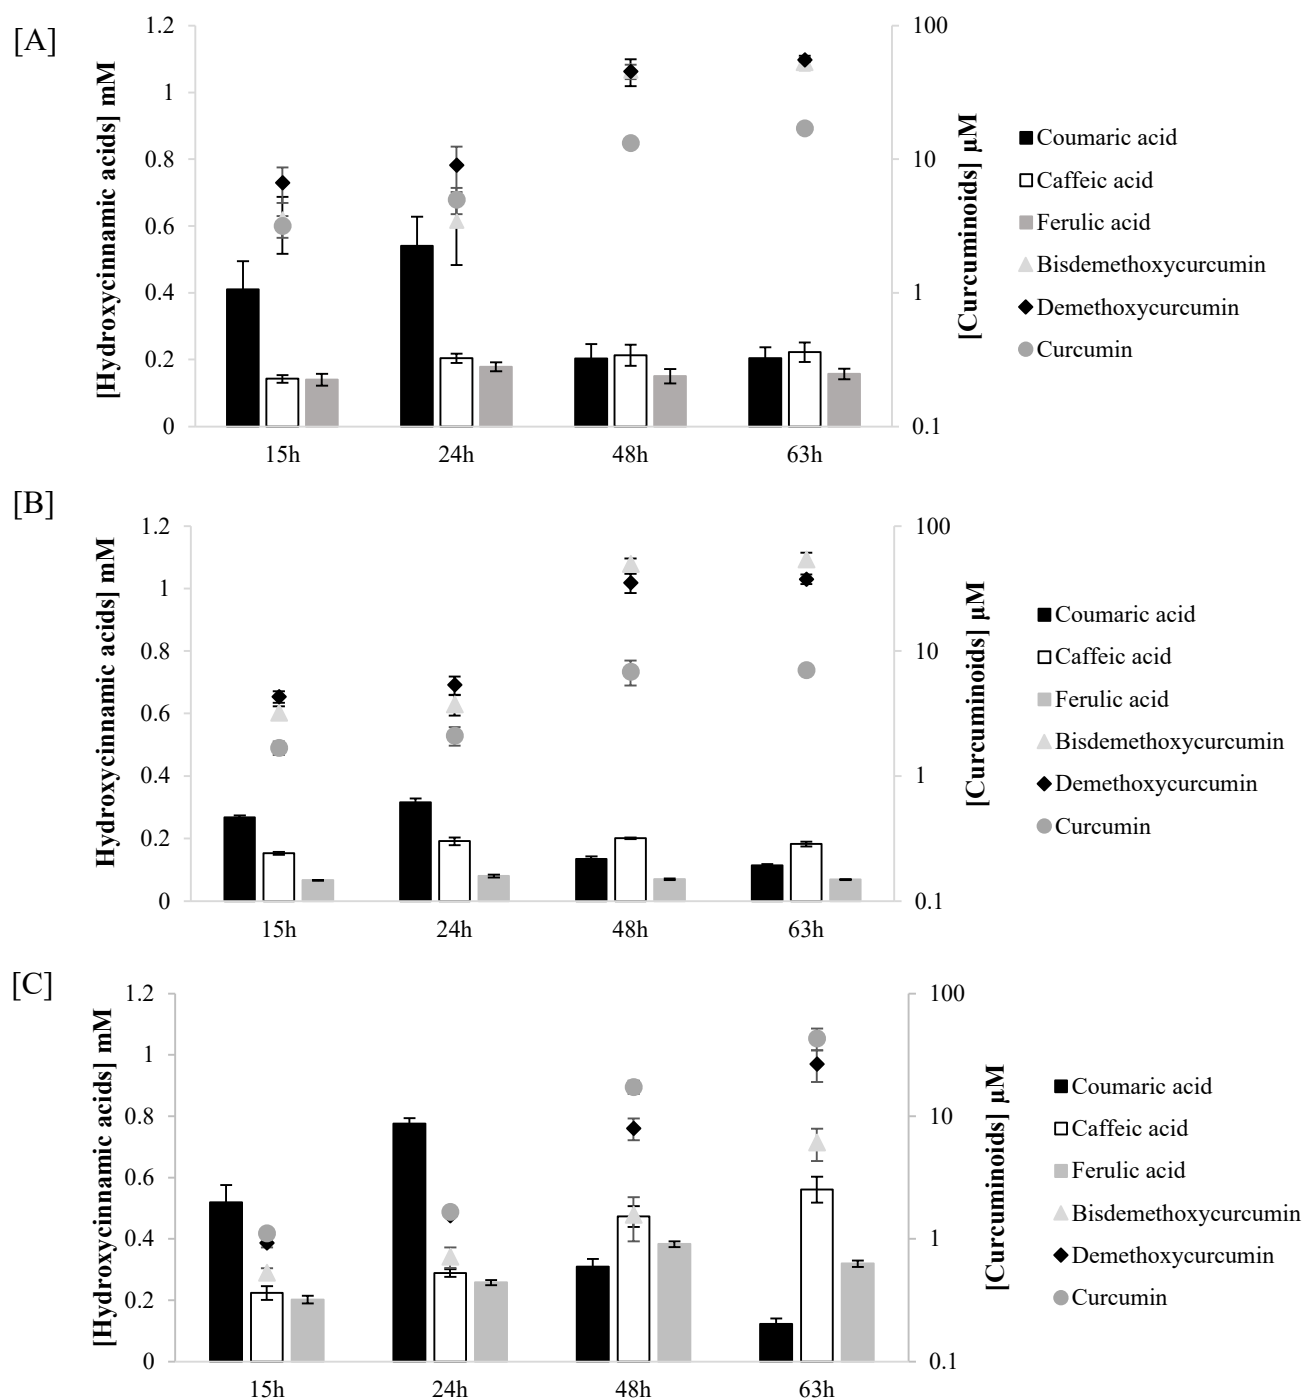

**Figure S2.** Curcuminoids and hydroxycinnamic acids production by co-culture 3 (*E. coli* BL21 (DE3) carried pCDFuet\_TAL and pRSFduet\_C3H\_COMT and *E. coli* BL21 (DE3) *AlacZ* carried pCDFduet\_DCS and pRSFduet\_CURS1\_4CL). Co-culture 3 was tested using different inoculation ratios: 1:1 (A), 1:2 (B) and 2:1 (C). TAL: tyrosine ammonia lyase, C3H: 4-coumarate 3-hydroxylase, COMT: caffeic acid O-methyltransferase, 4CL: 4-coumarate-CoA ligase, DCS: diketide-CoA synthase, CURS1: curcumin synthase 1.

- Chung, M.E., Yeh, I., Sung, L.Y., Wu, M.Y., Chao, Y.P., Ng, I.S., et al. (2017). Enhanced integration of large DNA into *E. coli* chromosome by CRISPR/Cas9. *Biotechnol. Bioeng.* 114, 172-183. doi: 10.1002/bit.26056.
- Reisch, C.R., and Prather, K.L. (2015). The no-SCAR (Scarless Cas9 Assisted Recombineering) system for genome editing in *Escherichia coli*. *Sci. Rep.* 5, 1-12. doi: 10.1038/srep15096.
